# Supplementary material for: Facile synthesis of bowl-like 3D Mg(BH4)2–NaBH4–fluorographene composite with unexpected superior dehydrogenation performances
Source: Royal Society of Chemistry journal article supplement (doi:10.1039/c7ta02595e), 2017-01-01
Supplement: c7ta02595e1.pdf [file c7ta02595e1.pdf]

## Supplementary Information

### **Facile synthesis of bowl-like 3D Mg(BH<sub>4</sub>)<sub>2</sub>-NaBH<sub>4</sub>-fluorographene composite with unexpected superior dehydrogenation performances**

**Jianguang Zheng<sup>1</sup>, Xuezhang Xiao<sup>1\*</sup>, Liuting Zhang<sup>1,2</sup>, Shouquan Li<sup>1</sup>, Hongwei Ge<sup>1</sup> and Lixin Chen<sup>1</sup>**

*<sup>1</sup> State Key Laboratory of Silicon Materials, Key Laboratory of Advanced Materials and Applications for Batteries of Zhejiang Province, School of Materials Science and Engineering, Zhejiang University, Hangzhou 310027, China*

*<sup>2</sup> School of Energy and Power Engineering, Jiangsu University of Science and Technology, Zhenjiang 212003, P.R. China*

In order to clarify the elemental distribution of Mg(BH<sub>4</sub>)<sub>2</sub>-NaBH<sub>4</sub> composite, SEM image of Mg(BH<sub>4</sub>)<sub>2</sub>-NaBH<sub>4</sub> composite and EDS mapping profiles are exhibited in Fig. S1. EDS mapping profiles show a concentration of element Na in the lamellar particles when Mg mainly takes place in the background. This result proves that NaBH<sub>4</sub> particles turn into lamellar form after ball-milling process.

---

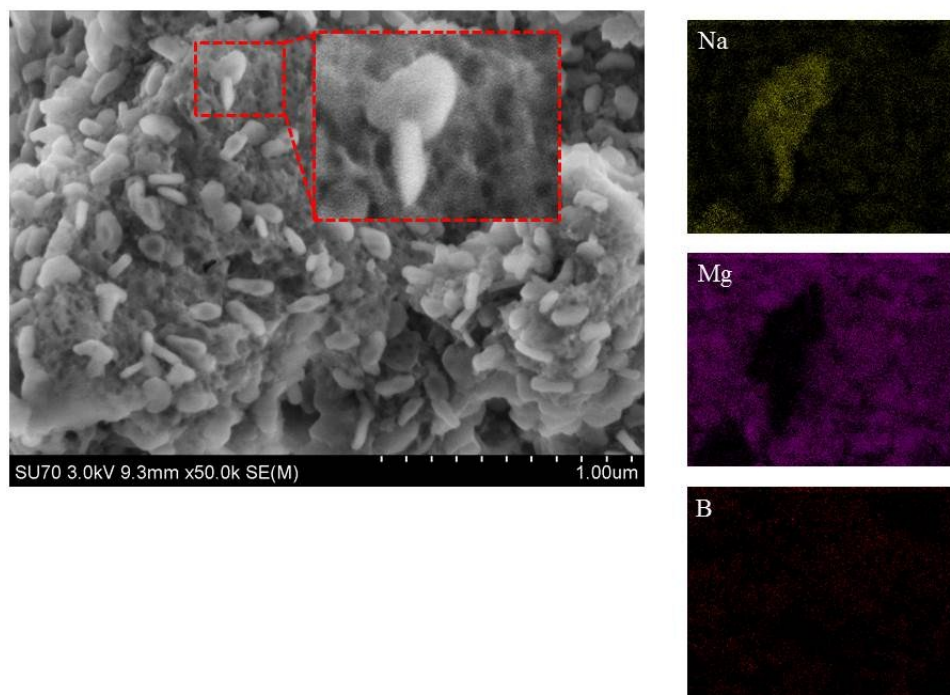

**Fig. S1** SEM image of  $\text{Mg}(\text{BH}_4)_2\text{-NaBH}_4$  particles and EDS mapping profiles of a selected area.

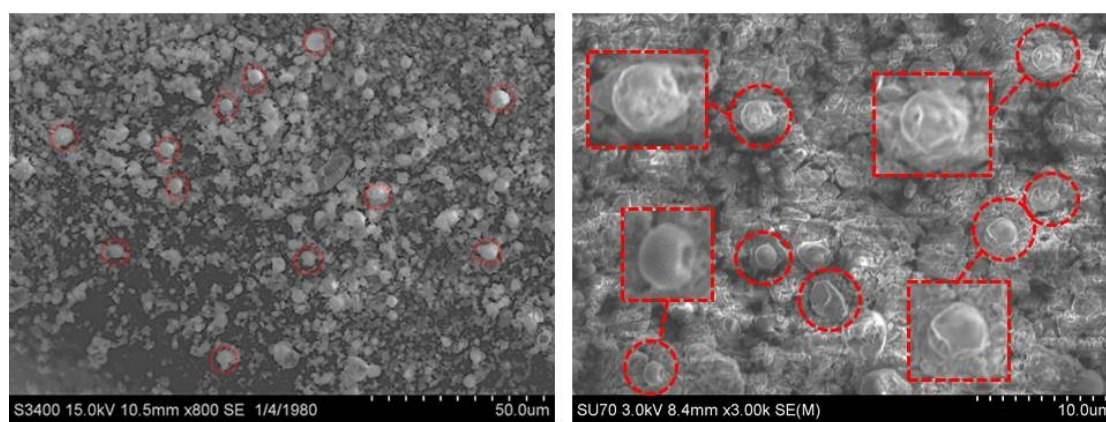

**Fig. S2** Low magnification SEM images of  $\text{Mg}(\text{BH}_4)_2\text{-NaBH}_4\text{-FG}$  composite.
